# Supplementary material for: Self-care practice and associated factors among hypertensive patients in public health facilities in Harar Town, Eastern Ethiopia: A cross-sectional study
Source: PubMed Central journal article supplement — SAGE Open Med. 2020 Dec 3;8:2050312120974145. doi: 10.1177/2050312120974145 (PMC7720317; doi:10.1177/2050312120974145), 2020-12-03
Supplement: sj-pdf-1-smo-10.1177_2050312120974145.pdf [file sj-pdf-1-smo-10.1177_2050312120974145.pdf]

1 **Supplementary File 2**

2 Table 1: Summary statistics of self-care practice and its domains among hypertensive patients in  
3 public health facilities in Harar Town, eastern Ethiopia, 2019 (n=391)

| <b>Characteristics</b>  | <b>Cronbach's <math>\alpha</math></b> | <b>Mean</b> | <b>SD</b> | <b>Minimum</b> | <b>Maximum</b> | <b>SE</b> |
|-------------------------|---------------------------------------|-------------|-----------|----------------|----------------|-----------|
| Self-care practice      | 0.86                                  | 3.51        | 1.15      | 1              | 6              | 0.06      |
| Adherence to medication | 0.73                                  | 13.24       | 5.61      | 0              | 21             | 0.28      |
| Weight management       | 0.96                                  | 29.82       | 13.43     | 10             | 50             | 0.68      |
| Physical activity       | 0.90                                  | 3.90        | 4.10      | 0              | 14             | 0.21      |
| Alcohol consumption     | 0.88                                  | 2.68        | 5.64      | 0              | 31             | 0.29      |
| Low salt diet           | 0.86                                  | 18.92       | 5.61      | 9              | 32             | 0.28      |

4 Note: SD=Standard Deviation, SE=Standard Error
